# Supplementary material for: Cryo-EM structures of tau filaments from Alzheimer’s disease with PET ligand APN-1607
Source: PubMed Central journal article supplement (PMC8043864; doi:10.1007/s00401-021-02294-3), 2021-03-16
Supplement: 401_2021_2294_MOESM1_ESM.pdf [file 401_2021_2294_MOESM1_ESM.pdf]

# **Cryo-EM structures of tau filaments from Alzheimer's disease with PET ligand APN-1607**

Yang Shi<sup>1</sup>, Alexey G. Murzin<sup>1</sup>, Benjamin Falcon<sup>1</sup>, Alexander Epstein<sup>1</sup>, Jonathan Machin<sup>1</sup>, Paul Tempest<sup>2</sup>, Kathy L. Newell<sup>3</sup>, Ruben Vidal<sup>3</sup>, Holly J. Garringer<sup>3</sup>, Naruhiko Sahara<sup>4</sup>, Makoto Higuchi<sup>4</sup>, Bernardino Ghetti<sup>3</sup>, Ming-Kuei Jang<sup>2</sup>, Sjors H.W. Scheres<sup>1\*†</sup> and Michel Goedert<sup>1\*†</sup>

<sup>1</sup>MRC Laboratory of Molecular Biology, Cambridge, UK.

<sup>2</sup>APRINOIA Therapeutics, Taipei, Taiwan.

<sup>3</sup>Department of Pathology and Laboratory Medicine, Indiana University School of Medicine, Indianapolis, IN 46202, USA

<sup>4</sup>National Institute of Radiological Sciences, National Institutes for Quantum and Radiological Science and Technology, Chiba 263-8555, Japan

\* Corresponding authors. Email: [mg@mrc-lmb.cam.ac.uk](mailto:mg@mrc-lmb.cam.ac.uk) (M.G.); [scheres@mrc-lmb.cam.ac.uk](mailto:scheres@mrc-lmb.cam.ac.uk) (S.H.W.S.). Telephone number: +44 (0)1223 267056 (M.G.); +44 (0)1223 267061 (S.H.W.S.)

† These authors jointly supervised this work

| <b>Name</b>         | <b>Epitope</b>         | <b>Supplier</b> | <b>Species</b> | <b>Type</b> | <b>IHC dilution</b> | <b>Validation</b> |
|---------------------|------------------------|-----------------|----------------|-------------|---------------------|-------------------|
| RD3 tau             | Tau 209-224            | Millipore       | Mouse          | Monoclonal  | 1:3,000             | [10]              |
| anti-4R tau         | Tau 275-291 (N279D)    | Cosmo Bio       | Rabbit         | Polyclonal  | 1:400               | [12]              |
| AT8                 | Tau pS202/pT205        | Thermo Fisher   | Mouse          | Monoclonal  | 1:300               | [36]              |
| anti-phospho TDP-43 | TDP-43 pS409/pS410     | Cosmo Bio       | Mouse          | Monoclonal  | 1:800               | [23, 27]          |
| 6F/3D               | $\beta$ -amyloid 8-17  | Agilent Dako    | Mouse          | Monoclonal  | 1:100               | [33]              |
| 4G8                 | $\beta$ -amyloid 17-24 | BioLegend       | Mouse          | Monoclonal  | 1:1,000             | [32]              |

## Supplemental figure 1

### List of primary antibodies

|                                        | +APN-1607<br>PHF: EMD-<br>12551<br>SF: EMD-<br>12552 | -APN-<br>1607                      | Immunopurification<br>AD case a | Immunopurification<br>AD case b | PCA<br>PHF:EMD-<br>12553    | PART 1                                                                                                                                                                                                              | PART 2          | PART 3<br>PHF: EMD-<br>12549<br>SF: EMD-<br>12550                                                  |
|----------------------------------------|------------------------------------------------------|------------------------------------|---------------------------------|---------------------------------|-----------------------------|---------------------------------------------------------------------------------------------------------------------------------------------------------------------------------------------------------------------|-----------------|----------------------------------------------------------------------------------------------------|
| <b>Data collection and processing</b>  |                                                      |                                    |                                 |                                 |                             |                                                                                                                                                                                                                     |                 |                                                                                                    |
| Electron microscope type               | Titan Krios                                          | Titan Krios                        | Titan Krios                     | Titan Krios                     | Titan Krios                 | Titan Krios                                                                                                                                                                                                         | Glacios         | Titan Krios                                                                                        |
| Nominal magnification                  | 105,000                                              | 105,000                            | 105,000                         | 105,000                         | 105,000                     | 105,000                                                                                                                                                                                                             | 92,000          | 105,000                                                                                            |
| Voltage (kV)                           | 300                                                  | 300                                | 300                             | 300                             | 300                         | 300                                                                                                                                                                                                                 | 200             | 300                                                                                                |
| Detector                               | K2 Summit                                            | K2 Summit                          | K2 Summit                       | K2 Summit                       | K2 Summit                   | K2 Summit                                                                                                                                                                                                           | Falcon III      | K2 Summit                                                                                          |
| Electron exposure (e-/Å <sup>2</sup> ) | 50.6                                                 | 54.8                               | 51.2                            | 51.31                           | 52.96                       | 52.0                                                                                                                                                                                                                | 44.8            | 58.0                                                                                               |
| Defocus range (µm)                     | -1.0 to -3.0                                         | -1.4 to -2.8                       | -1.0 to -3.5                    | -1.0 to -3.0                    | -1.0 to -3.5                | -1.5 to -3.0                                                                                                                                                                                                        | -1.5 to -3.5    | -1.3 to -3.2                                                                                       |
| Pixel size (Å)                         | 1.15                                                 | 1.15                               | 1.055                           | 1.15                            | 1.15                        | 1.15                                                                                                                                                                                                                | 1.58            | 0.82                                                                                               |
| Micrographs (no.)                      | 2,169                                                | 589                                | 2,838                           | 5,740                           | 1,931                       | 834                                                                                                                                                                                                                 | 1,286           | 4,854                                                                                              |
| Initial particle images (no.)          | 749,433                                              | 428,100                            | 144,568                         | 174,851                         | 790,297                     | 540,264                                                                                                                                                                                                             | 73,551          | 1,810,902                                                                                          |
| Final particle images (no.)            | PHFs: 277,058<br>SFs: 20,075                         | PHFs:<br>326,318<br>SFs:<br>26,837 | PHFs: 112,172<br>SFs: 31,663    | PHFs: 80,734                    | PHFs: 95,375<br>SFs: 41,971 | PHFs:<br>53,878<br>SFs:<br>222,145<br>CTE type<br>I: 62,027<br>PHF: 3.17<br>SF: 2.83<br>CTE type<br>I: 3.13<br>PHF: 2.38<br>SF: 4.77<br>CTE type<br>I: 2.37<br>PHF:<br>179.46<br>SF: -1.07<br>CTE type<br>I: 179.44 | PHFs:<br>31,541 | PHFs:<br>425,943<br>SFs: 475,025<br>SFs1: 31,311<br>SFs2: 14,886                                   |
| Map resolution (Å; FSC=0.143)          | PHF: 3.00<br>SF: 3.55                                | PHF:<br>2.80<br>SF: 3.17           | PHF: 2.91<br>SF: 6.95           | PHF: 3.17                       | PHF: 3.55<br>SF: 5.16       | PHF: 3.55<br>SF: 5.16                                                                                                                                                                                               | PHF:<br>5.80    | PHF: 2.76<br>SF: 2.68<br>SF1: 2.97<br>SF2: 3.26<br>PHF: 2.37<br>SF: 4.75<br>SF1: 4.76<br>SF2: 4.77 |
| Helical rise (Å)                       | PHF: 2.37<br>SF: 4.75                                | PHF:<br>2.38<br>SF: 4.77           | PHF: 2.38<br>SF: 4.60           | PHF: 2.37                       | PHF: 2.37<br>SF: 4.74       | PHF: 2.37<br>SF: 4.74                                                                                                                                                                                               | PHF:<br>2.375   | PHF: 2.76<br>SF: 2.68<br>SF1: 2.97<br>SF2: 3.26<br>PHF: 2.37<br>SF: 4.75<br>SF1: 4.76<br>SF2: 4.77 |
| Helical twist (°)                      | PHF: 179.45<br>SF: -1.02                             | PHF:<br>179.45<br>SF: -1.09        | PHF: 179.42<br>SF: -1.05        | PHF: 179.46                     | PHF: 179.44<br>SF: -1.05    | PHF: 179.44<br>SF: -1.05                                                                                                                                                                                            | PHF:<br>179.45  | PHF: 179.44<br>SF: -1.08<br>SF1: -1.02<br>SF2: -1.08                                               |

|                                    | +APN-1607 (PHF)<br>PDB: 7NRV | +APN-1607 (SF)<br>PDB: 7NRX | PART 3 (PHF)<br>PDB: 7NRQ | PART 3 (SF, conformation 1)<br>PDB: 7NRS | PART 3 (SF, conformation 2)<br>PDB: 7NRT |
|------------------------------------|------------------------------|-----------------------------|---------------------------|------------------------------------------|------------------------------------------|
| <b>Refinement</b>                  |                              |                             |                           |                                          |                                          |
| Initial model used                 | 6HRE                         | 6HRF                        | 6HRE                      | 6HRF                                     | 6HRF                                     |
| Model resolution (Å; FSC=0.5)      | 3.10                         | 3.39                        | 2.69                      | 2.69                                     | 2.63                                     |
| Map sharpening <i>B</i> factor (Å) | -89.20                       | -76.13                      | -67.21                    | -50.40                                   | -50.40                                   |
| Model composition                  |                              |                             |                           |                                          |                                          |
| Non-hydrogen atoms                 | 5870                         | 5870                        | 5870                      | 5870                                     | 5870                                     |
| Protein residues                   | 770                          | 770                         | 770                       | 770                                      | 770                                      |
| Protein B factor (Å)               | 50.52                        | 75.09                       | 10.58                     | 57.72                                    | 57.49                                    |
| R.m.s. deviations                  |                              |                             |                           |                                          |                                          |
| Bond lengths (Å)                   | 0.007                        | 0.010                       | 0.006                     | 0.009                                    | 0.009                                    |
| Bond angles (°)                    | 1.145                        | 1.466                       | 1.115                     | 1.079                                    | 1.089                                    |
| Validation                         |                              |                             |                           |                                          |                                          |
| MolProbity score                   | 1.55                         | 1.86                        | 1.70                      | 1.61                                     | 1.50                                     |
| Clashscore                         | 3.52                         | 6.37                        | 5.03                      | 6.04                                     | 4.53                                     |
| Poor rotamers (%)                  | 0                            | 0                           | 0                         | 0                                        | 0                                        |
| Ramachandran plot                  |                              |                             |                           |                                          |                                          |
| Favored (%)                        | 94.00                        | 91.33                       | 93.20                     | 96.00                                    | 96.00                                    |
| Allowed (%)                        | 100                          | 100                         | 100                       | 100                                      | 100                                      |
| Disallowed (%)                     | 0                            | 0                           | 0                         | 0                                        | 0                                        |

## Supplemental figure 2

### Cryo-EM data collection, model refinement and validation statistics

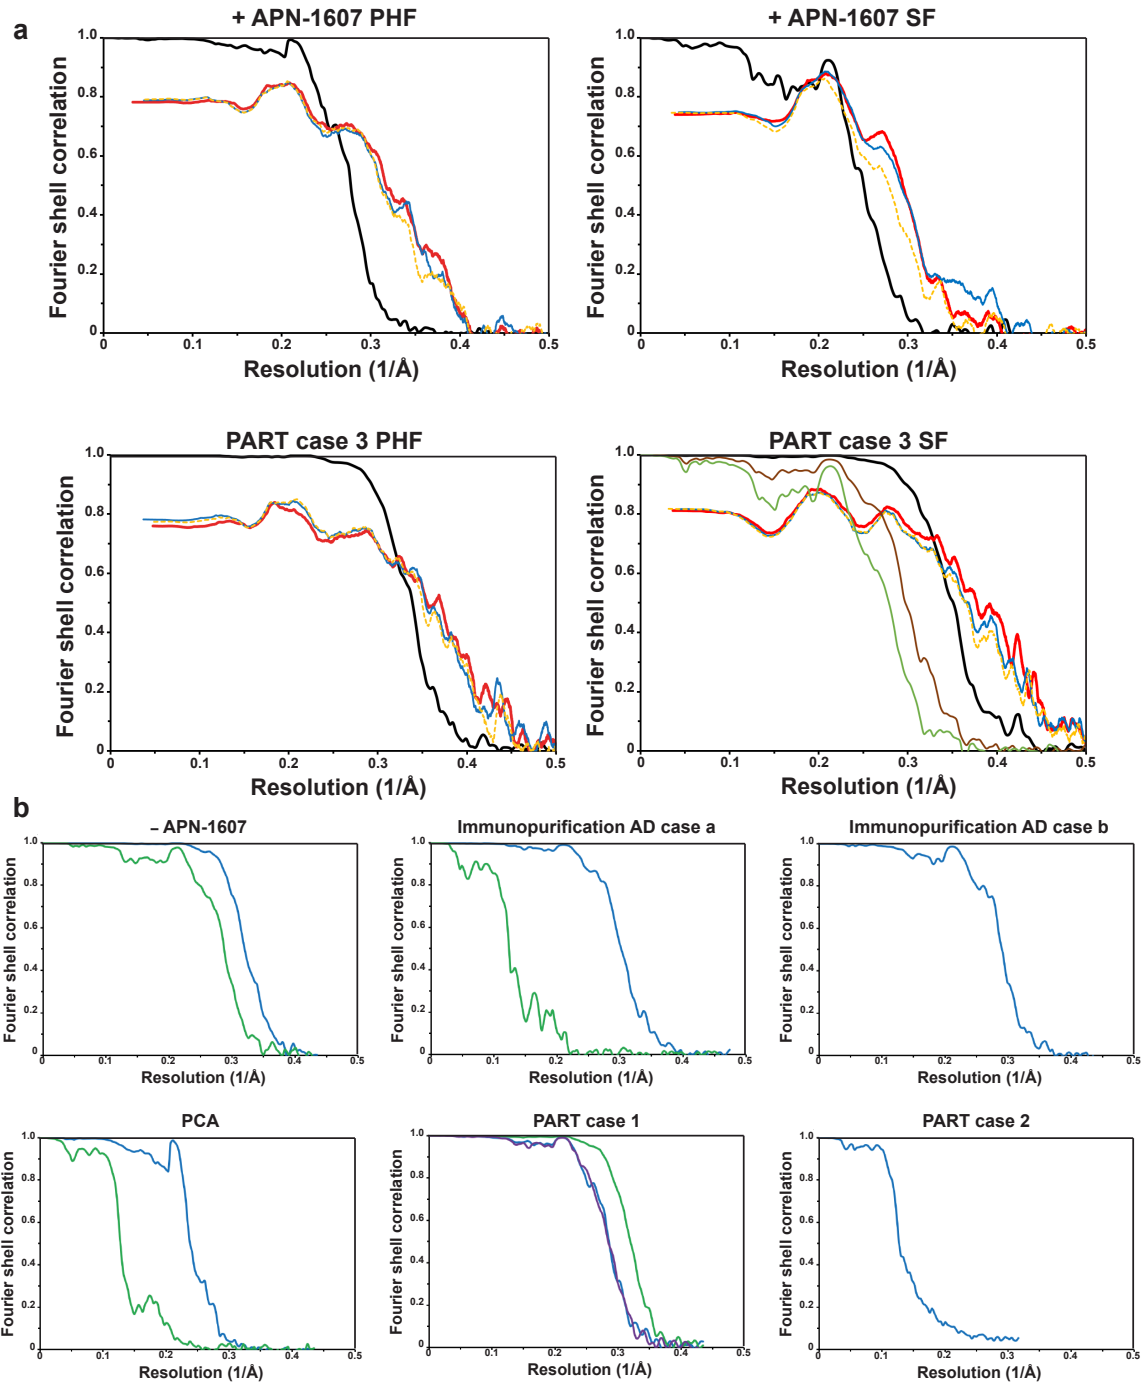

### Supplemental figure 3

#### Cryo-EM maps and model comparisons

(a), PHF (+APN-1607) and SF (+APN-1607) from the frontal cortex of Alzheimer's disease case 2 (in reference [15]), as well as PHF and SF from the hippocampus of PART case 3. Fourier shell correlation (FSC) curves of two independently refined half-maps

(black line); FSC curves of final cryo-EM reconstruction and refined atomic model (red); FSC curves of the first half-map and the atomic model refined against this map (blue); FSC curves of the second half-map and the atomic model refined against the first half-map (yellow dashes). For SFs from PART case 3, in addition to the FSC curves for the consensus map and model, the FSC curves for two independently refined half-maps for conformation 1 and 2, which were identified after focused classification, are shown in brown and green, respectively.

(b), FSC curves of two independently refined half-maps of PHFs (blue), SFs (green) and CTE type I filaments (purple) from the frontal cortex of two cases of AD (immunopurified), occipital cortex from an individual with PCA, hippocampus of PART case 1 and entorhinal cortex of PART case 2

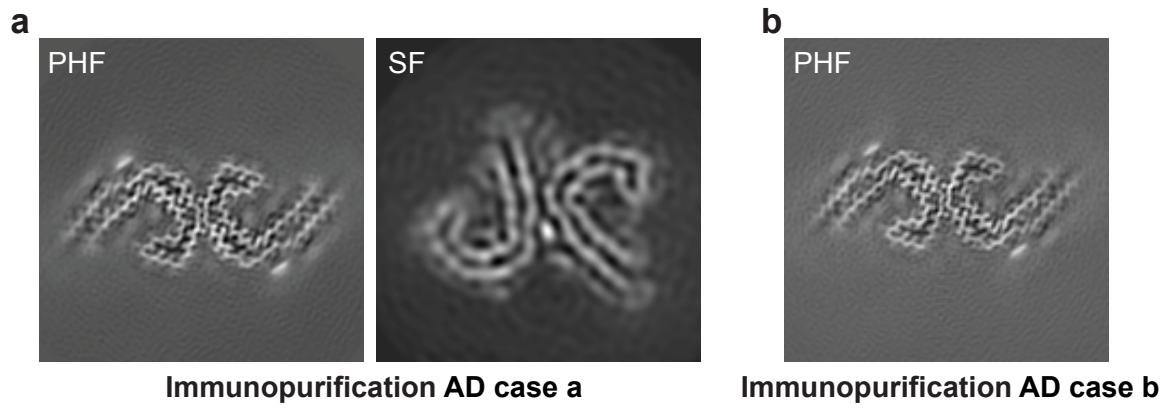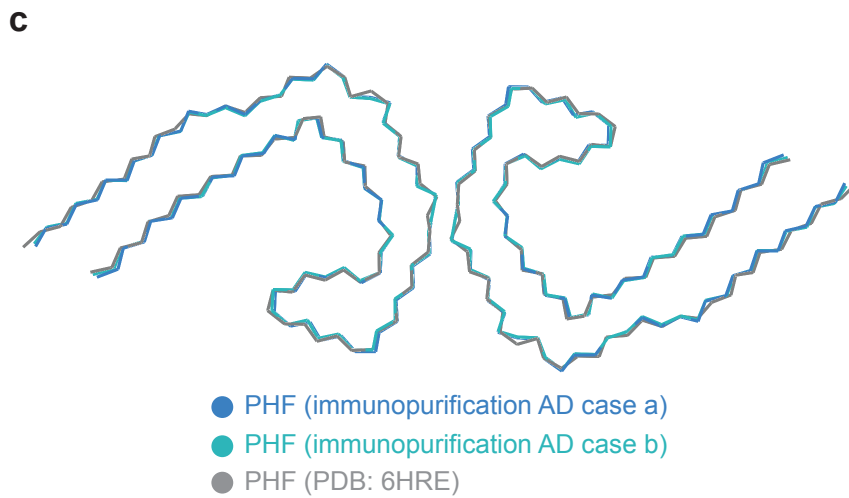

#### Supplemental figure 4

#### Cryo-EM maps of immunopurified PHFs and SFs from Alzheimer's disease (cases a and b)

(a), PHF and SF from the frontal cortex of case a.

(b), PHF from the frontal cortex of case b.

(c), Overlay of the structures of immunopurified PHFs (cases a and b) and sarkosyl-extracted PHF (PDB: 6HRE).

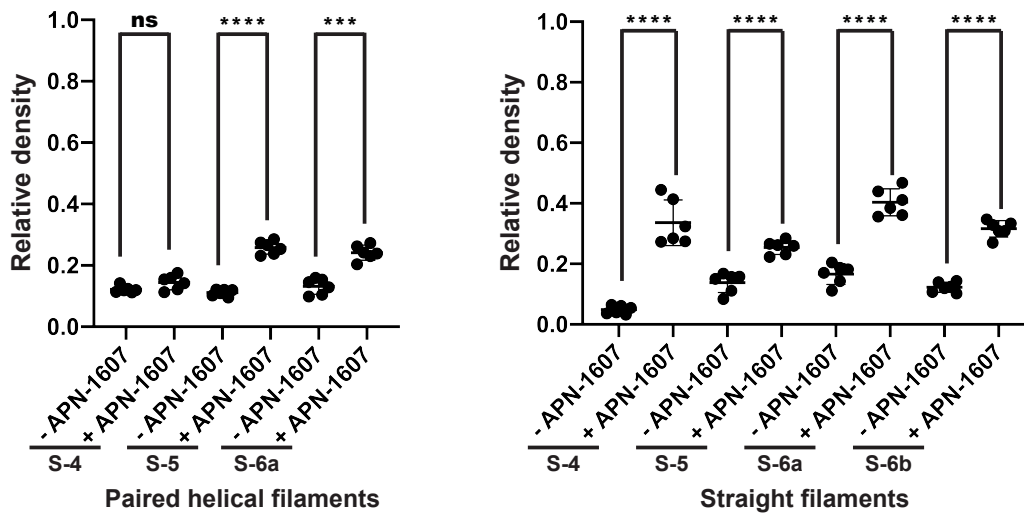

## Supplemental figure 5

### Relative densities of minor APN-1607 sites

Relative densities of minor sites (4, 5, 6a and 6b) in PHF and SF maps. Means, standard deviations and individual values of 6 half-set reconstructions are shown. The PHF maps were negative for S-6b. Unpaired two-tailed t test: \*\*\*\* $p < 0.0001$ ; ns, not significant.

| Binding site                    | Ligand    | Mean   | S.D.   | n | Unpaired two-tailed t test |       |                    | F test |
|---------------------------------|-----------|--------|--------|---|----------------------------|-------|--------------------|--------|
|                                 |           |        |        |   | P                          | T     | Degrees of Freedom | P      |
| <b>Paired helical filaments</b> |           |        |        |   |                            |       |                    |        |
| 1                               | -APN-1607 | 0.0647 | 0.0136 | 6 | 6.0904E-14                 | 57.55 | 10                 | 0.1536 |
|                                 | +APN-1607 | 0.4207 | 0.0068 |   |                            |       |                    |        |
| 2a                              | -APN-1607 | 0.1527 | 0.0078 | 6 | 9.7447E-13                 | 43.57 | 10                 | 0.0222 |
|                                 | +APN-1607 | 0.6196 | 0.0251 |   |                            |       |                    |        |
| 2b                              | -APN-1607 | 0.0936 | 0.0082 | 6 | 1.2632E-10                 | 26.68 | 10                 | 0.0326 |
|                                 | +APN-1607 | 0.3738 | 0.0244 |   |                            |       |                    |        |
| 4                               | -APN-1607 | 0.1218 | 0.0108 | 6 | 0.0585                     | 2.135 | 10                 | 0.1058 |
|                                 | +APN-1607 | 0.1445 | 0.0238 |   |                            |       |                    |        |
| 5                               | -APN-1607 | 0.1114 | 0.0108 | 6 | 3.2385E-08                 | 15.12 | 10                 | 0.1686 |
|                                 | +APN-1607 | 0.2583 | 0.0212 |   |                            |       |                    |        |
| 6a                              | -APN-1607 | 0.1317 | 0.0258 | 6 | 1.8674E-05                 | 7.587 | 10                 | 0.9054 |
|                                 | +APN-1607 | 0.2416 | 0.0244 |   |                            |       |                    |        |
| <b>Straight filaments</b>       |           |        |        |   |                            |       |                    |        |
| 1                               | -APN-1607 | 0.1100 | 0.0087 | 6 | 1.3231E-08                 | 16.59 | 10                 | 0.0005 |
|                                 | +APN-1607 | 0.5445 | 0.0636 |   |                            |       |                    |        |
| 2a                              | -APN-1607 | 0.1106 | 0.0445 | 6 | 3.8457E-09                 | 18.84 | 10                 | 0.2753 |
|                                 | +APN-1607 | 0.5088 | 0.0264 |   |                            |       |                    |        |
| 2b                              | -APN-1607 | 0.0727 | 0.0105 | 6 | 1.9969E-10                 | 25.47 | 10                 | 0.0235 |
|                                 | +APN-1607 | 0.4390 | 0.0336 |   |                            |       |                    |        |
| 3                               | -APN-1607 | 0.1731 | 0.0238 | 6 | 8.8147E-09                 | 17.30 | 10                 | 0.0405 |
|                                 | +APN-1607 | 0.6744 | 0.0669 |   |                            |       |                    |        |
| 4                               | -APN-1607 | 0.0484 | 0.0137 | 6 | 3.3846E-06                 | 9.203 | 10                 | 0.0020 |
|                                 | +APN-1607 | 0.3359 | 0.0753 |   |                            |       |                    |        |
| 5                               | -APN-1607 | 0.1381 | 0.0330 | 6 | 3.4777E-05                 | 7.055 | 10                 | 0.4606 |
|                                 | +APN-1607 | 0.2545 | 0.0233 |   |                            |       |                    |        |
| 6a                              | -APN-1607 | 0.1664 | 0.0339 | 6 | 1.1484E-06                 | 10.36 | 10                 | 0.5620 |
|                                 | +APN-1607 | 0.4035 | 0.0446 |   |                            |       |                    |        |
| 6b                              | -APN-1607 | 0.1229 | 0.0169 | 6 | 3.9774E-08                 | 14.80 | 10                 | 0.3197 |
|                                 | +APN-1607 | 0.3160 | 0.0271 |   |                            |       |                    |        |

## Supplemental figure 6

### Statistical analysis of relative densities at binding sites



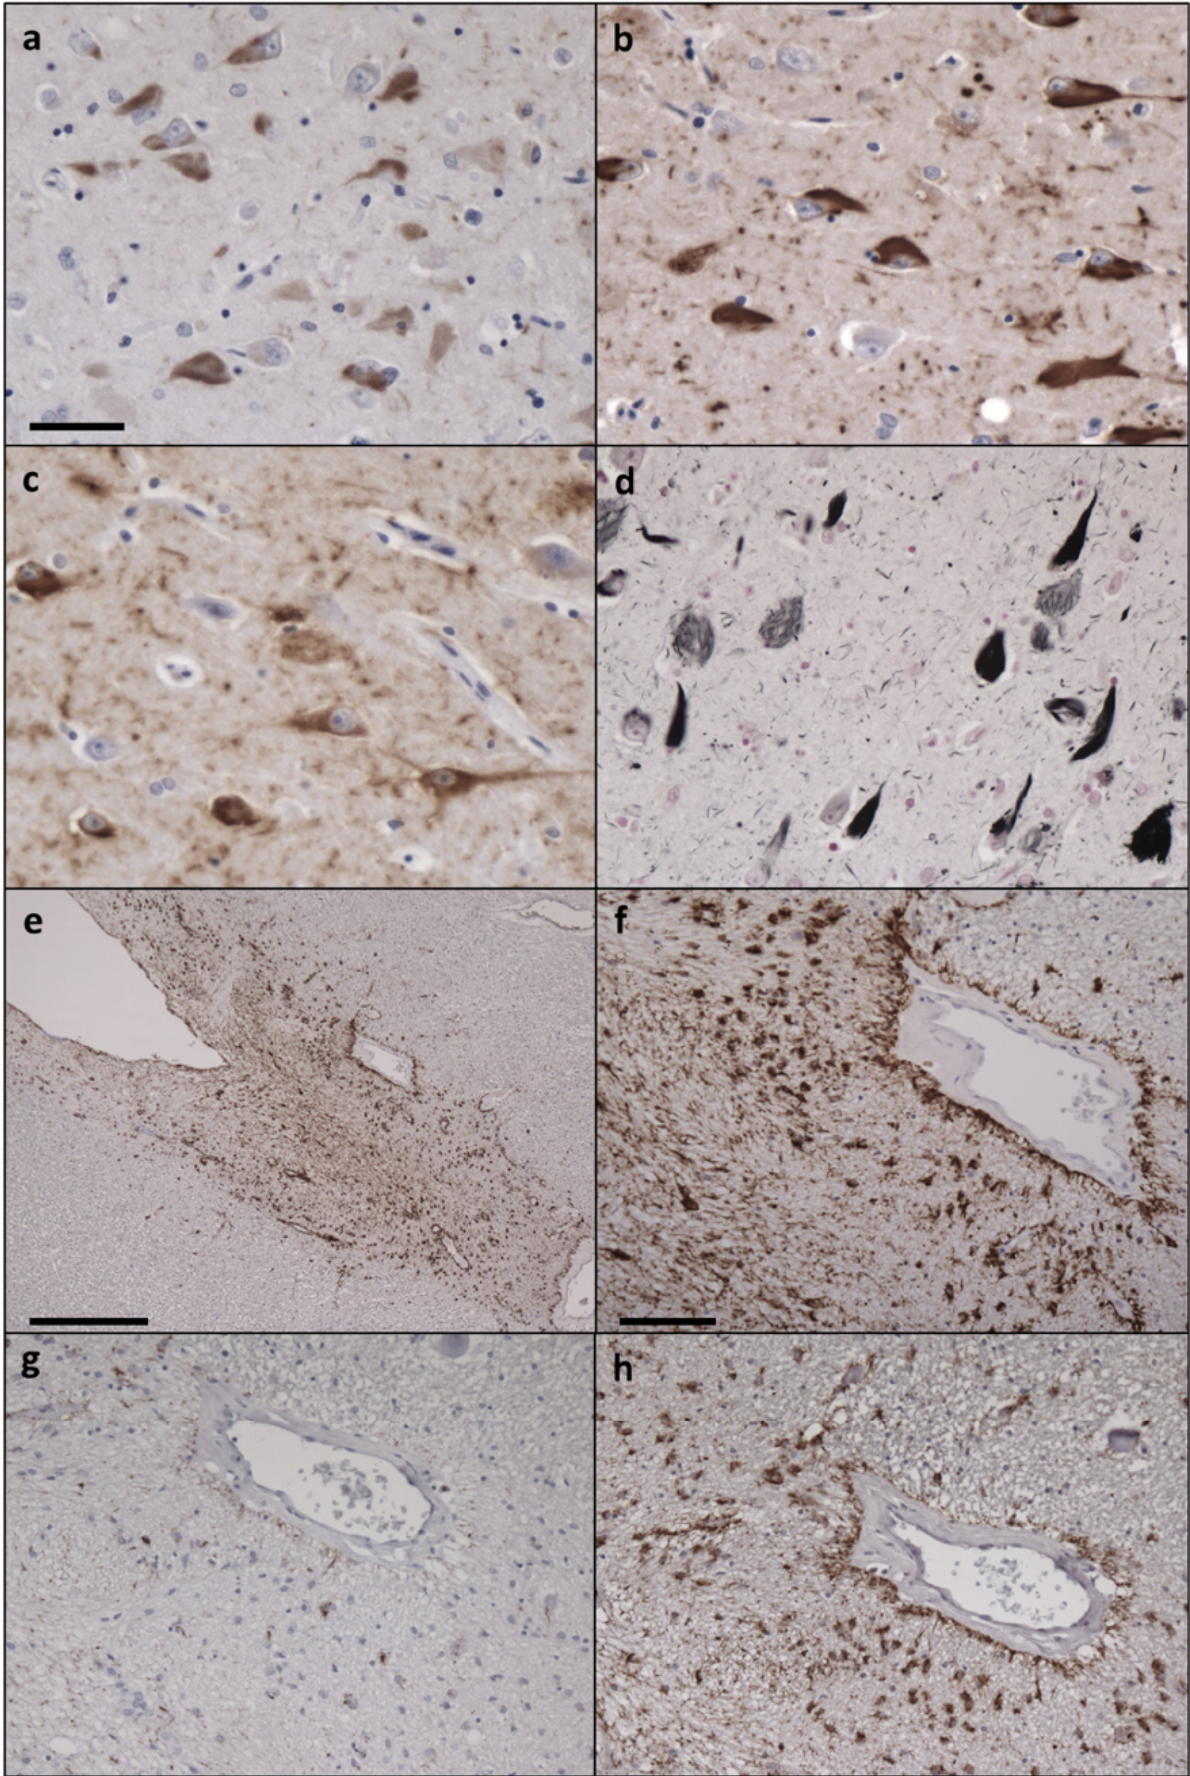

## **Supplemental figure 7**

### **Tau staining of hippocampus and occipital cortex from PART case 1**

Immunohistochemical staining of sections from hippocampus (a-d) and occipital cortex (e-h) using anti-tau antibodies RD3 (a,g), anti-4R (b,h) and AT8 (c,e,f). Gallyas-Braak silver staining was used in (d). Nuclei were counterstained. Scale bars: 50  $\mu\text{m}$  (in a, for a-d), 500  $\mu\text{m}$  (in e, for e,g), 100  $\mu\text{m}$  (in f, for f,h). Panels (e) and (f) show the same section from occipital cortex at different magnifications.

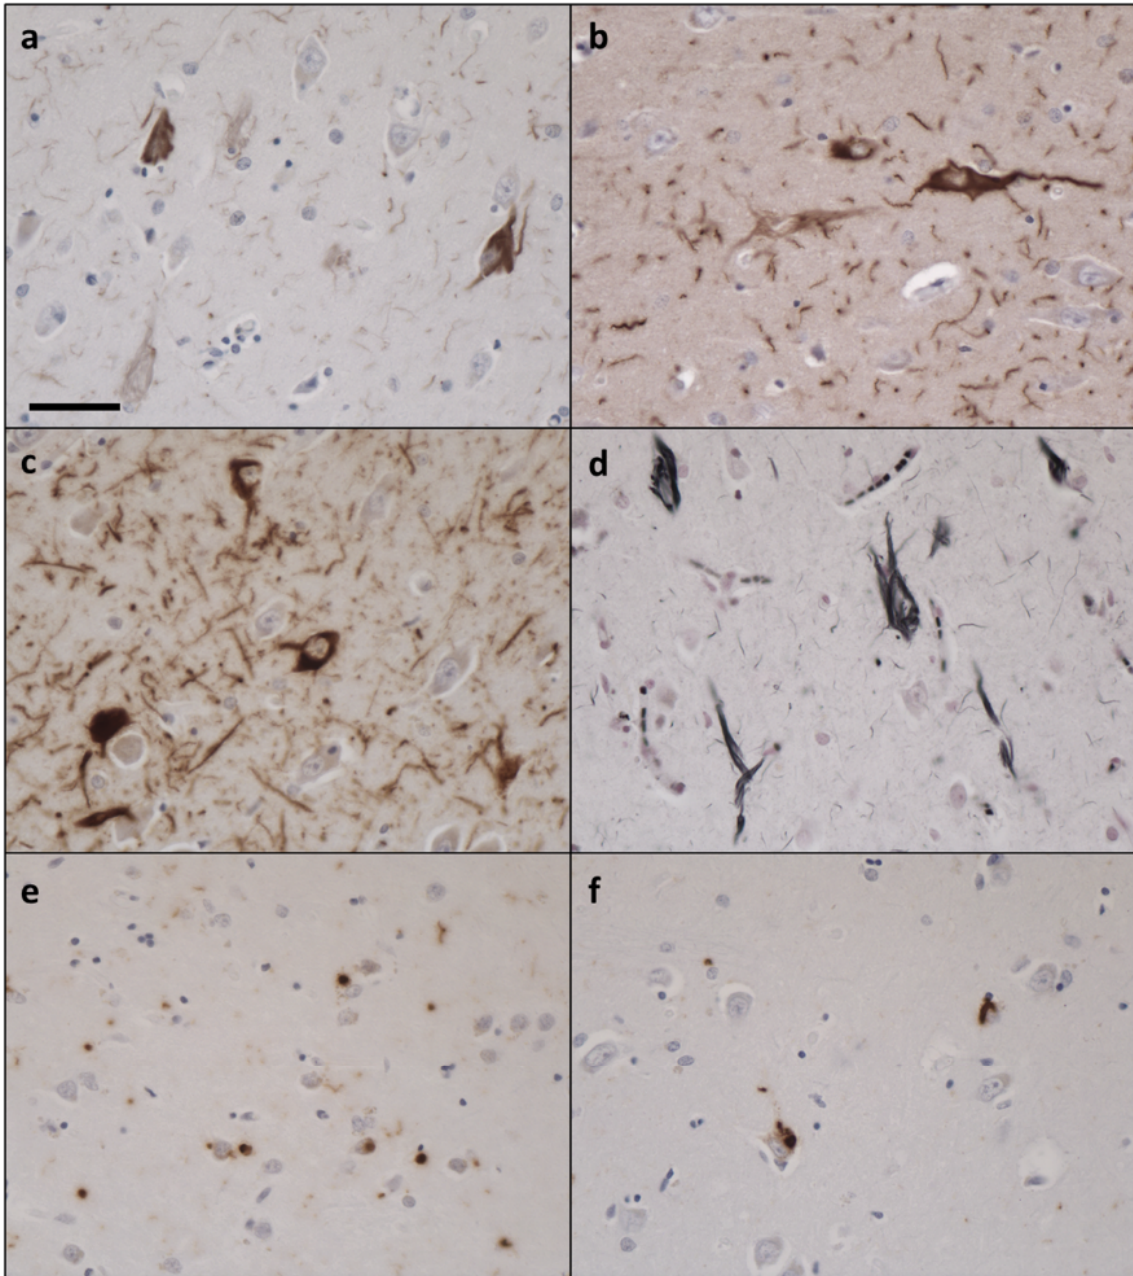

### Supplemental figure 8

#### Tau staining of hippocampal formation from PART case 2

Immunohistochemical staining of sections from hippocampal formation (a-d) using anti-tau antibodies RD3 (a), anti-4R (b) and AT8 (c). Gallyas-Braak silver staining was used in (d). Putamen (g) and amygdala (h) were stained for TDP-43. Scale bar: 50  $\mu$ m (in a, for a-h).

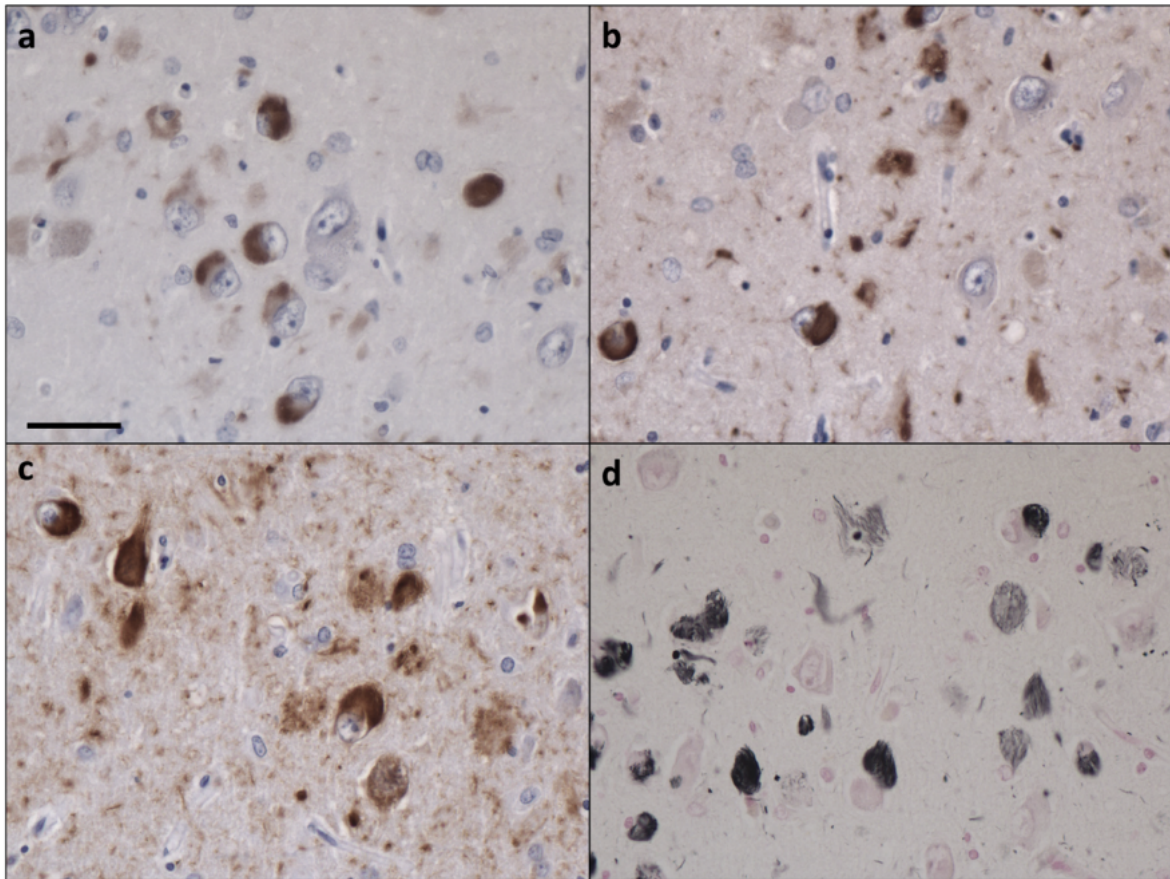

### Supplemental figure 9

#### Tau staining of hippocampal formation from PART case 3

Immunohistochemical staining of sections from hippocampal formation (a-d) using anti-tau antibodies RD3 (a), anti-4R (b) and AT8 (c). Gallyas-Braak silver staining was used in (d). Scale bars: 50  $\mu\text{m}$  (in a, for a-d).

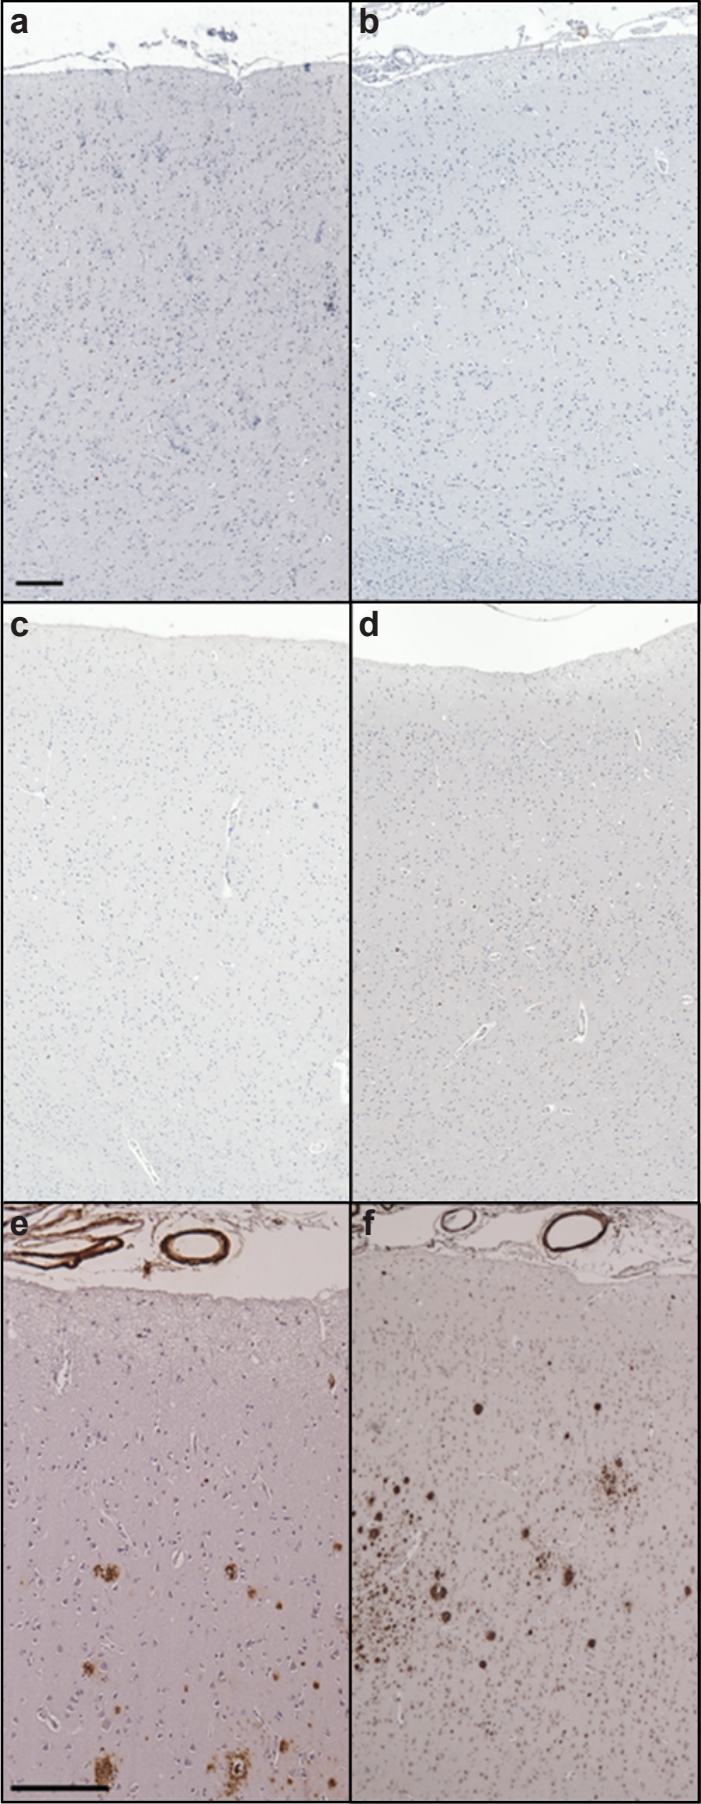

## **Supplemental figure 10**

### **A $\beta$ staining of cerebral cortex from PART cases 1-3**

Immunohistochemical staining of sections from frontal (a,c,e) and temporal (b,d,f) cerebral cortices of PART case 1 (a,b), PART case 2 (c,d) and PART case 3 (e,f) using anti-A $\beta$  antibody 4G8. Scale bars: 200  $\mu$ m (in a, for a-d, and in e, for e,f).
